# Supplementary material for: Solution structure and metal ion binding sites of the human CPEB3 ribozyme’s P4 domain
Source: Springer Nature journal article supplement (doi:10.1007/s00775-014-1125-6), 2014-03-20
Supplement: MOESM1 [file 775_2014_1125_MOESM1_ESM.pdf]

## Supplementary Material

### Solution structure and metal ion binding sites of the human CPEB3 ribozyme's P4 region

Miriam Skilandat<sup>1</sup>, Magdalena Rowinska-Zyrek<sup>1</sup> and Roland K. O. Sigel\*

phone: 41 44 635 4652

fax: 41 44 635 6802

✉ roland.sigel@chem.uzh.ch

Department of Chemistry, University of Zurich, Winterthurerstrasse 190, CH-8057 Zurich, Switzerland

[1] these authors contributed equally to this work

[\*] to whom correspondence should be addressed

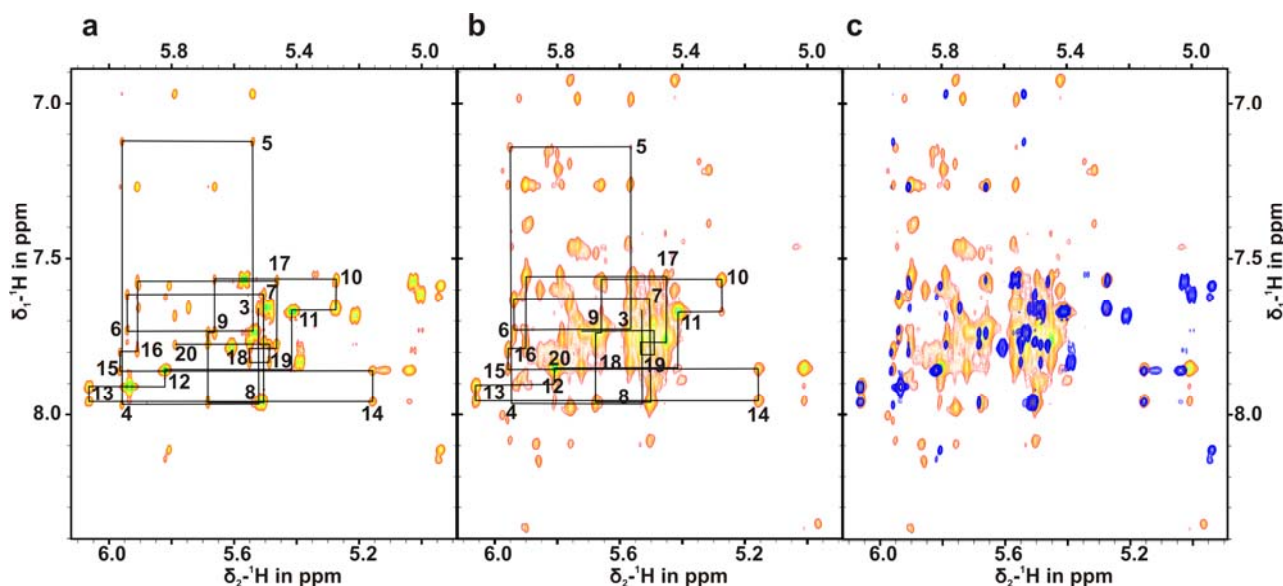

Figure S1. Comparison of the sequential walk regions of [<sup>1</sup>H,<sup>1</sup>H]-NOESY experiments (D<sub>2</sub>O, 298 K, pD = 6.8) of (a) the P4 domain and (b) the full-length CPEB3. The sequential correlations of residues 3-20 of P4 are connected by black lines. (c) Overlay of (a) and (b): the CPEB3 P4 spectrum is shown in blue and the spectrum of the full-length CPEB3 ribozyme is shown in red-green. The chemical shifts and cross peak intensities of residues 3-20 of the P4 construct are in nice agreement with the corresponding signals of the full-length CPEB3.
